# Supplementary material for: The Impact of Frailty on Adverse Outcomes in Geriatric Hip Fracture Patients: A Systematic Review and Meta-Analysis
Source: PubMed Central journal article supplement (PMC9280195; doi:10.3389/fpubh.2022.890652), 2022-06-30
Supplement: Table_1.pdf [file Table_1.pdf]

### Search strategy for PubMed (404)

| ID | Search                                                                                                                                                                                                                              |
|----|-------------------------------------------------------------------------------------------------------------------------------------------------------------------------------------------------------------------------------------|
| #1 | (Frail[Title/Abstract]) OR (frailty[Title/Abstract])                                                                                                                                                                                |
| #2 | hip fractures[MeSH Terms]                                                                                                                                                                                                           |
| #3 | (((((Femoral Fracture*[Title/Abstract]) OR (Intertrochanteric Fracture*[Title/Abstract])) OR (Trochanteric Fracture*[Title/Abstract])) OR (Femoral Neck Fracture*[Title/Abstract])) OR (Subtrochanteric Fracture*[Title/Abstract])) |
| #4 | #2 OR #3                                                                                                                                                                                                                            |
| #5 | #1 AND #4                                                                                                                                                                                                                           |
| #6 | #5 Publication Year from 1990 to 2021                                                                                                                                                                                               |
| #7 | #6 excluded review                                                                                                                                                                                                                  |

### Search strategy for Web of science ( 924)

| ID | Search                                                                                                                                                                                      |
|----|---------------------------------------------------------------------------------------------------------------------------------------------------------------------------------------------|
| #1 | (TS=(frail)) OR TS=(frailty) OR TS=(frail elderly)                                                                                                                                          |
| #2 | (((((TS=(hip fracture*)) OR TS=(Femoral Fracture*)) OR TS=(Femoral Neck Fracture*)) OR TS=(Intertrochanteric Fracture*)) OR TS=(Trochanteric Fracture*)) OR TS=(Subtrochanteric Fracture*)) |
| #3 | #1 AND #2                                                                                                                                                                                   |
| #4 | #3 Publication Date 1990-01-01 to 2021-10-10                                                                                                                                                |
| #5 | #4 excluded review articles, Meeting, Patent, Editorial materials, letters, case report;                                                                                                    |

### Search strategy for Cochorane of library ( 161)

| ID | Search                                                                                                                                                                                                        |
|----|---------------------------------------------------------------------------------------------------------------------------------------------------------------------------------------------------------------|
| #1 | (frail):ti,ab,kw OR (frailty):ti,ab,kw OR (frail elderly):ti,ab,kw                                                                                                                                            |
| #2 | hip fractures                                                                                                                                                                                                 |
| #3 | (hip fracture*):ti,ab,kw OR (Femoral Fracture*):ti,ab,kw OR (Femoral Neck Fracture*):ti,ab,kw OR (Intertrochanteric Fracture*):ti,ab,kw OR ((Trochanteric Fracture*) OR (Subtrochanteric Fracture*)):ti,ab,kw |
| #4 | #2 OR #3                                                                                                                                                                                                      |
| #5 | #1 AND #4                                                                                                                                                                                                     |

|    |                             |
|----|-----------------------------|
| #6 | #5 limit 1990-01 to 2021-10 |
| #7 | Limit to trails             |

### Search strategy for Embase(299)

| ID | Search                                                                                                                                                                                             |
|----|----------------------------------------------------------------------------------------------------------------------------------------------------------------------------------------------------|
| #1 | 'frail elderly'/exp OR 'frailty'/exp OR 'frail'                                                                                                                                                    |
| #2 | 'hip fracture'/exp                                                                                                                                                                                 |
| #3 | 'hip fracture*':ab,ti OR 'femoral fracture*':ab,ti OR 'femoral neck fracture*':ab,ti OR 'intertrochanteric fracture*':ab,ti OR 'trochanteric fracture*':ab,ti OR 'subtrochanteric fracture*':ab,ti |
| #4 | #2 OR #3                                                                                                                                                                                           |
| #5 | #1 AND #4                                                                                                                                                                                          |
| #6 | #5 limit 1990-01 to 2021-10                                                                                                                                                                        |
| #7 | #6 AND 'article'/it<br>AND ('clinical article'/de OR 'cohort analysis'/de OR 'observational study'/de OR 'prospective study'/de OR 'retrospective study'/de)                                       |
