# Supplementary material for: The Impact of Frailty on Adverse Outcomes in Geriatric Hip Fracture Patients: A Systematic Review and Meta-Analysis
Source: PubMed Central journal article supplement (PMC9280195; doi:10.3389/fpubh.2022.890652), 2022-06-30
Supplement: Table_2.pdf [file Table_2.pdf]

## Supplementary file2

### Newcastle-Ottawa Scale for assessing the quality of studies in meta-analysis

| Study                | Selection                 |                                          |                                    |                                                       | Comparability | Outcome               |                                                 |                                  | scores |
|----------------------|---------------------------|------------------------------------------|------------------------------------|-------------------------------------------------------|---------------|-----------------------|-------------------------------------------------|----------------------------------|--------|
|                      | Ascertainment of exposure | Representativeness of the exposed cohort | Selection of the nonexposed cohort | Outcome of interest was not present at start of study |               | Assessment of outcome | Was follow-up long enough for outcomes to occur | Adequacy of follow-up of cohorts |        |
| Patel et al, 2014    | 1                         | 1                                        | 1                                  | 1                                                     | 0             | 1                     | 1                                               | 1                                | 7      |
| Kua et al, 2016      | 1                         | 1                                        | 1                                  | 1                                                     | 0             | 0                     | 1                                               | 1                                | 6      |
| Chan et al, 2019     | 1                         | 1                                        | 1                                  | 1                                                     | 0             | 1                     | 1                                               | 1                                | 7      |
| Chen et al, 2019     | 1                         | 1                                        | 1                                  | 1                                                     | 1             | 1                     | 1                                               | 1                                | 8      |
| Winters et al, 2018  | 1                         | 1                                        | 1                                  | 1                                                     | 0             | 1                     | 1                                               | 1                                | 7      |
| Choi et al, 2017     | 1                         | 1                                        | 1                                  | 1                                                     | 0             | 0                     | 1                                               | 1                                | 6      |
| Jorissen et al, 2020 | 1                         | 1                                        | 1                                  | 1                                                     | 0             | 1                     | 1                                               | 1                                | 7      |
| Choi et al, 2021     | 1                         | 1                                        | 1                                  | 1                                                     | 0             | 1                     | 1                                               | 1                                | 7      |
| Thorne et al, 2021   | 1                         | 1                                        | 1                                  | 1                                                     | 0             | 0                     | 1                                               | 1                                | 6      |
| Pizzonia et al, 2021 | 1                         | 1                                        | 1                                  | 1                                                     | 0             | 1                     | 1                                               | 1                                | 7      |
| Shimizu et al., 2021 | 1                         | 1                                        | 1                                  | 1                                                     | 0             | 1                     | 1                                               | 1                                | 7      |
